# Supplementary figures and images for: Effect of anions on the phase transition temperature of two structurally isomeric polymers: poly(N-isopropylacrylamide) and poly(2-isopropyl-2-oxazoline)
Source: Royal Society of Chemistry journal article supplement (doi:10.1039/d2py00543c), 2022-01-01

**a**

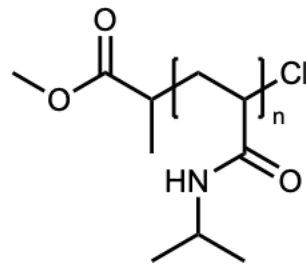

**b**

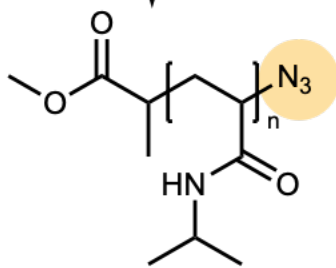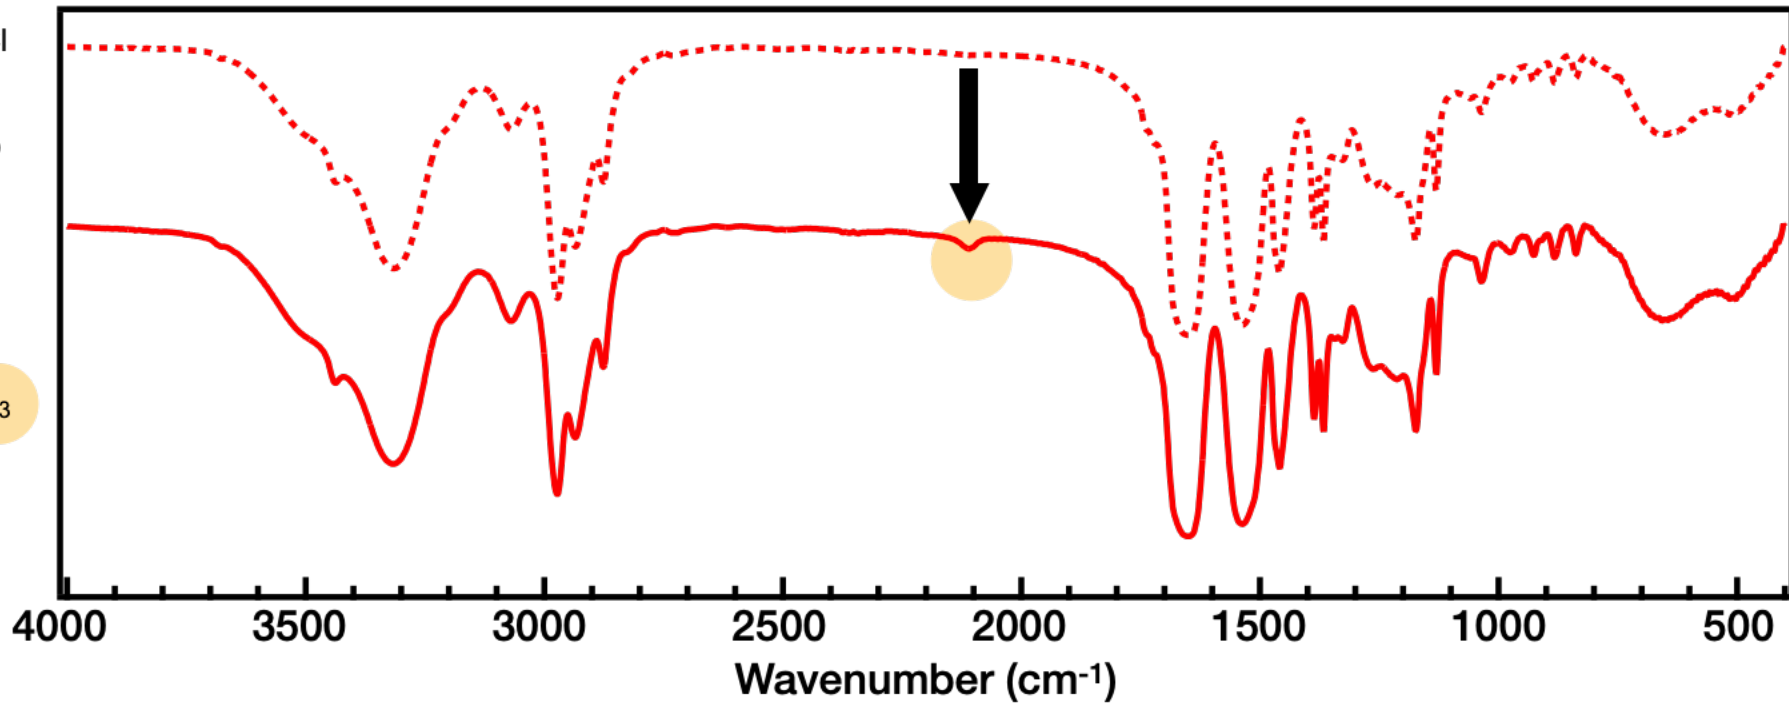

Supplement: d2py00543c1.pdf [file d2py00543c1.pdf]

**a**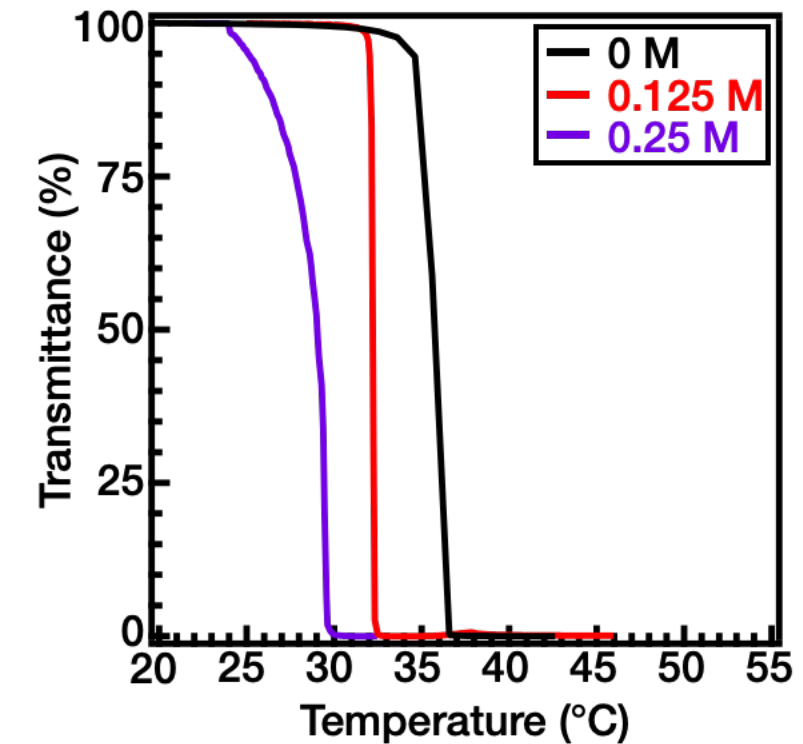**b**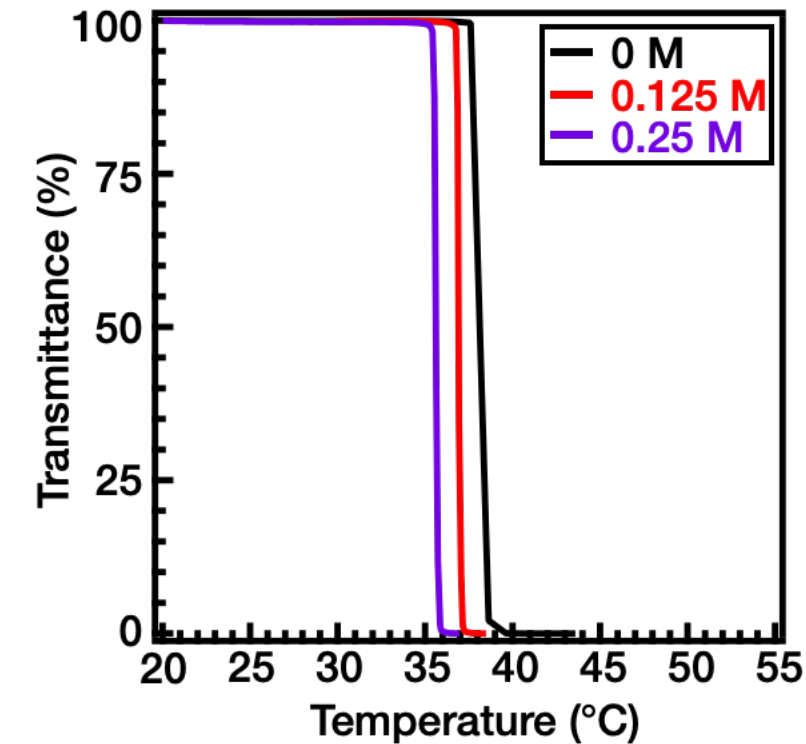**c**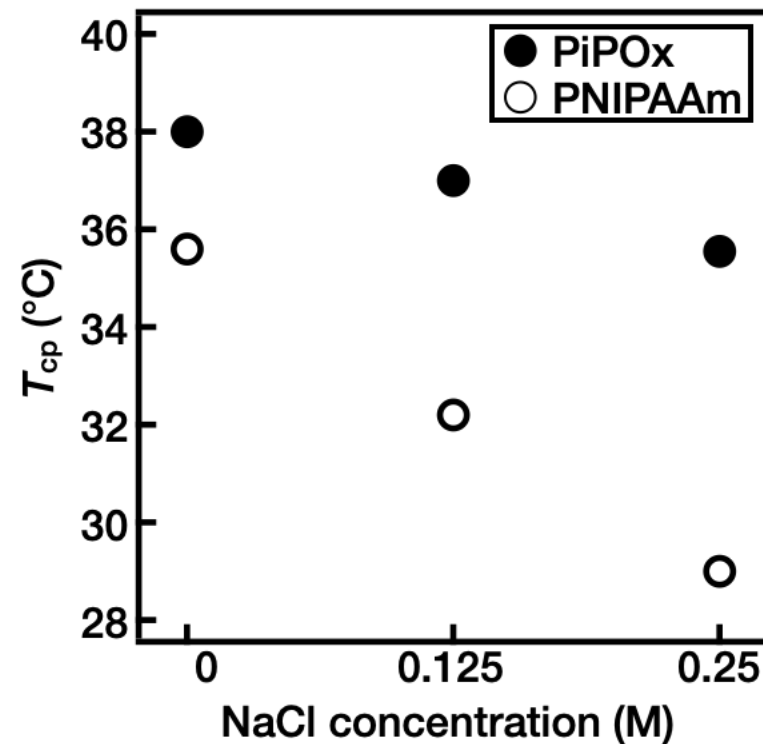

Supplement: d2py00543c10.pdf [file d2py00543c10.pdf]

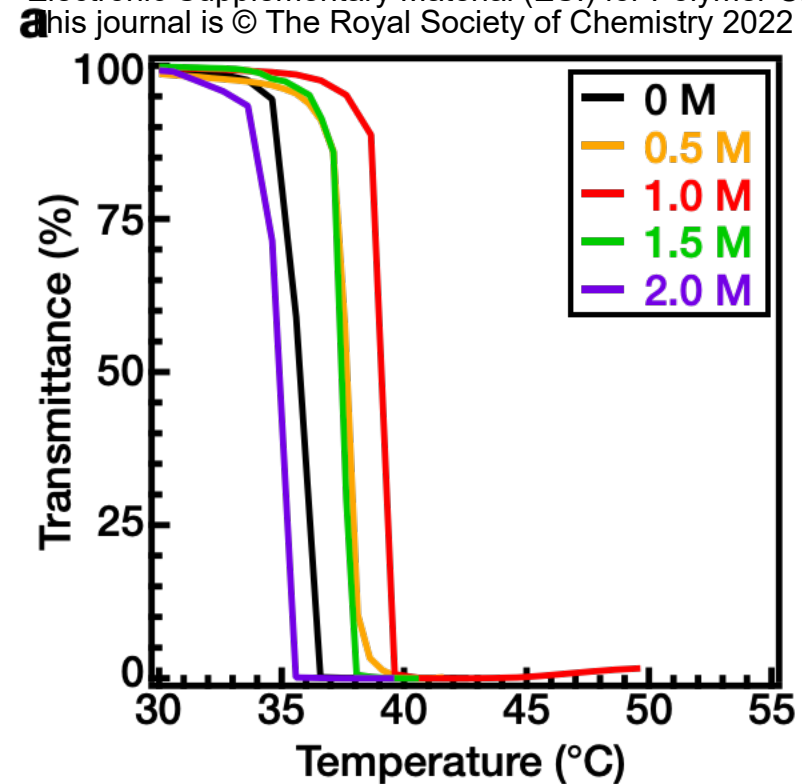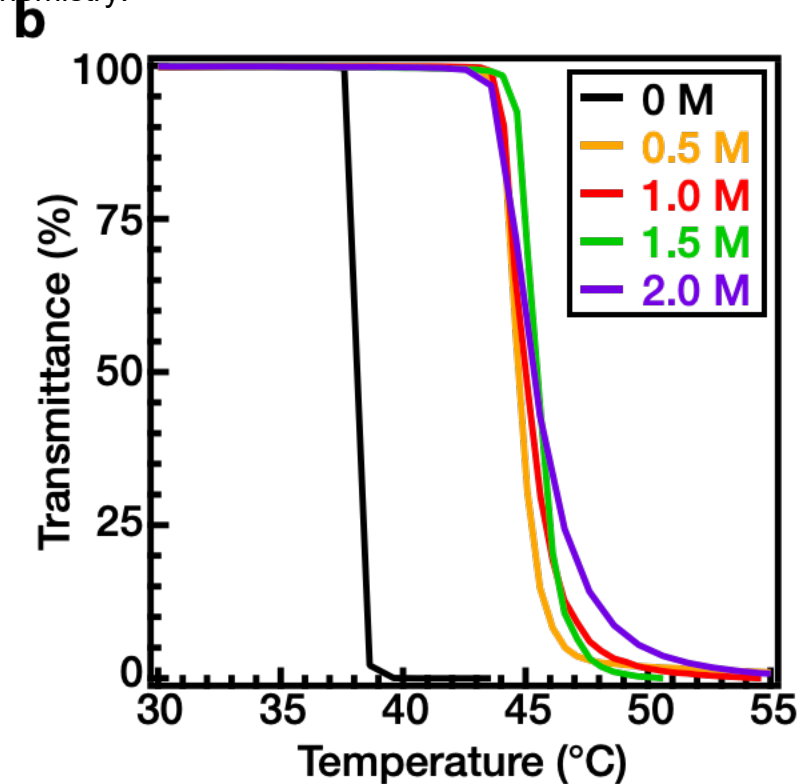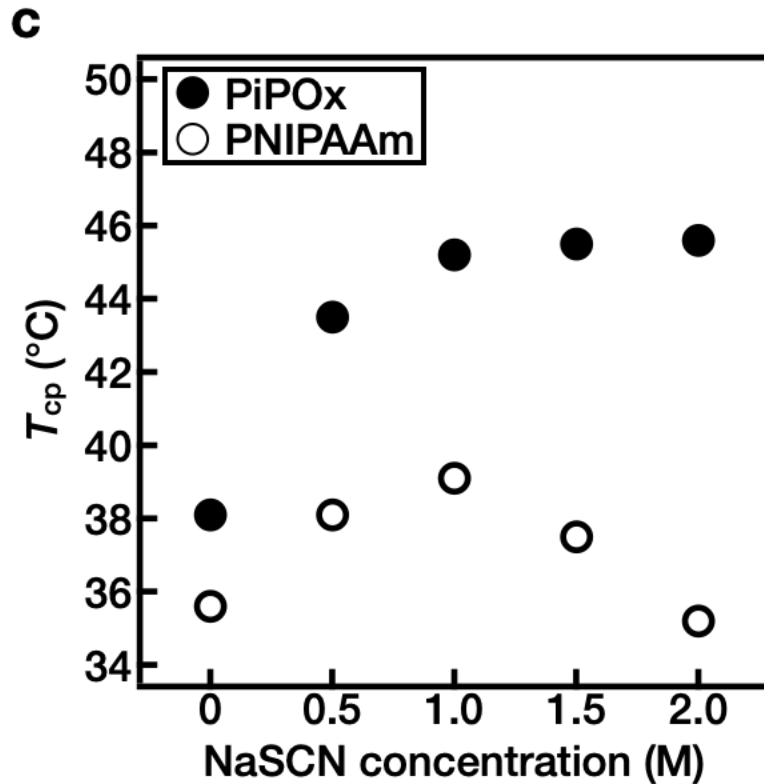

Supplement: d2py00543c11.pdf [file d2py00543c11.pdf]

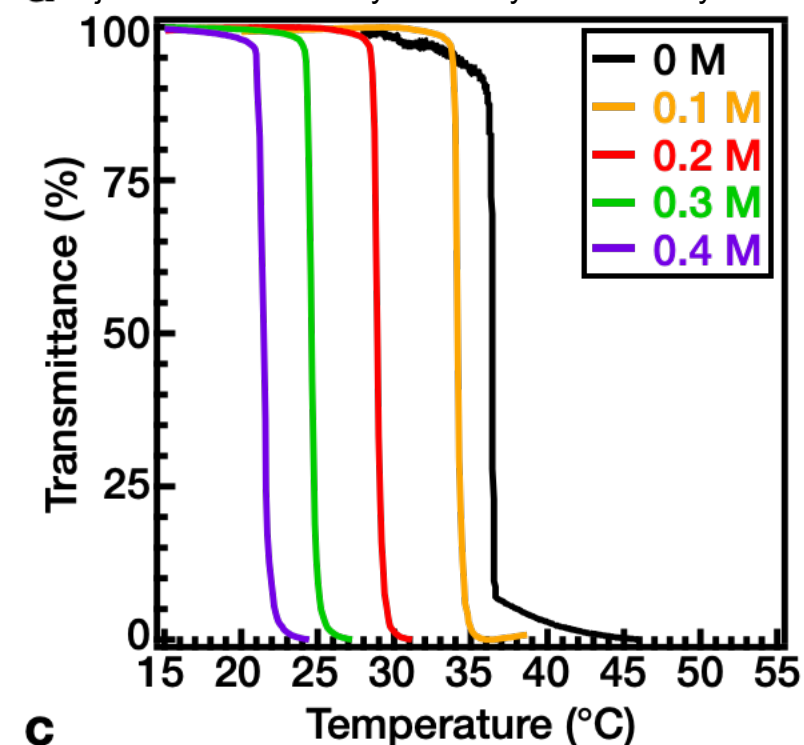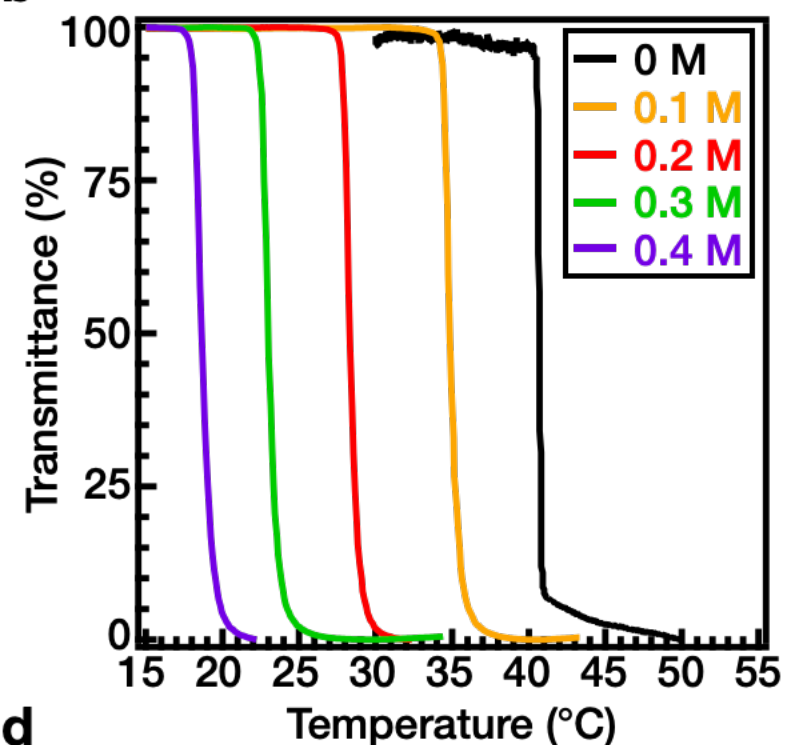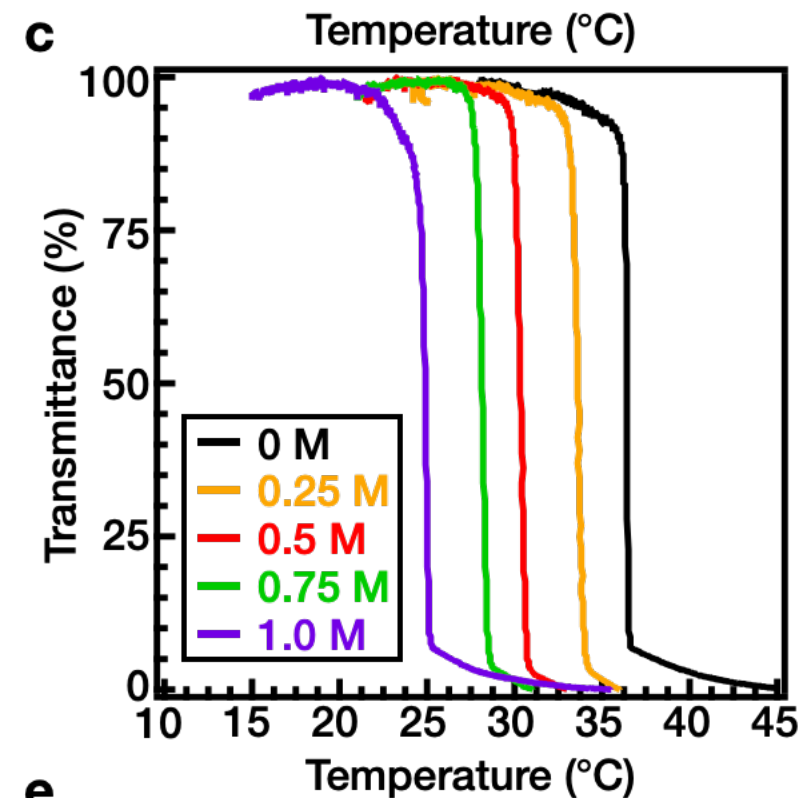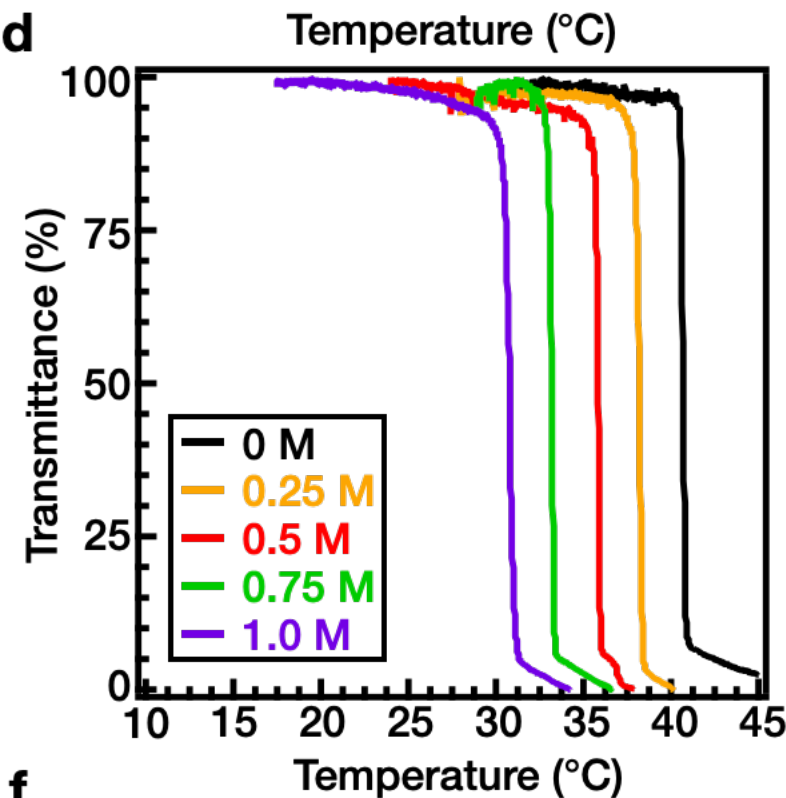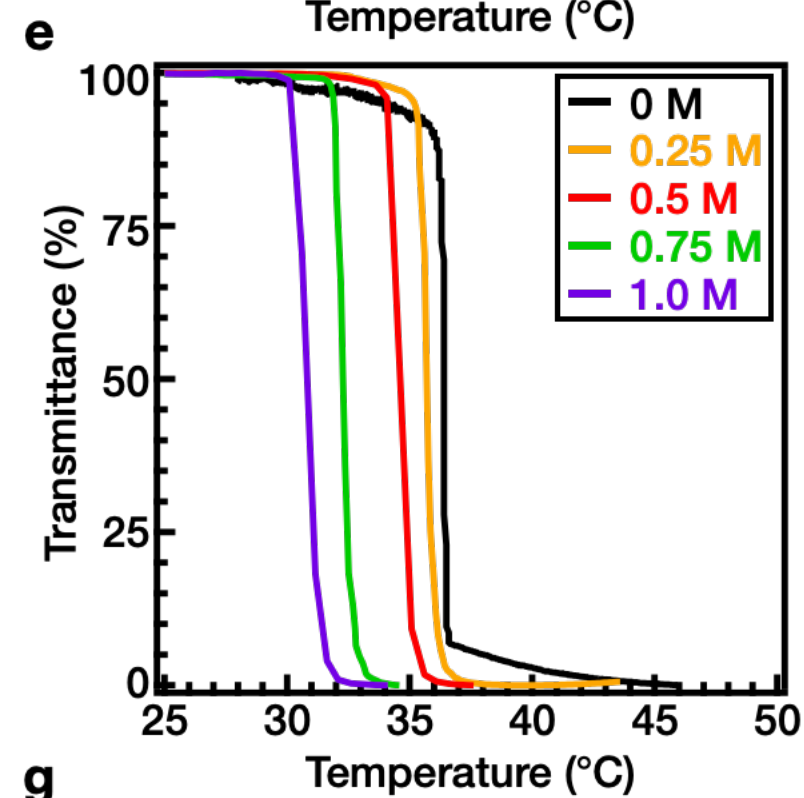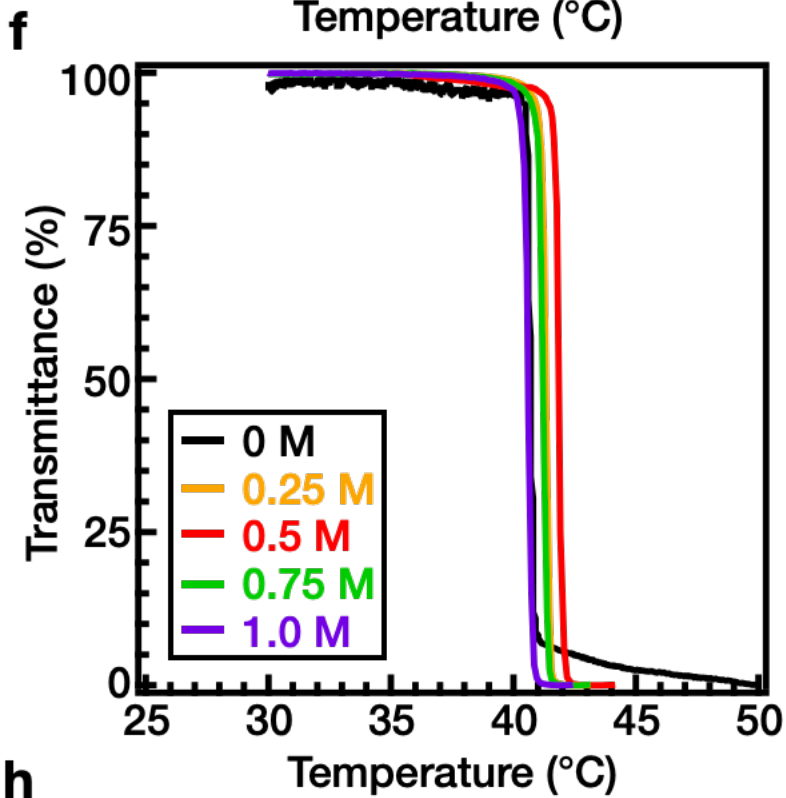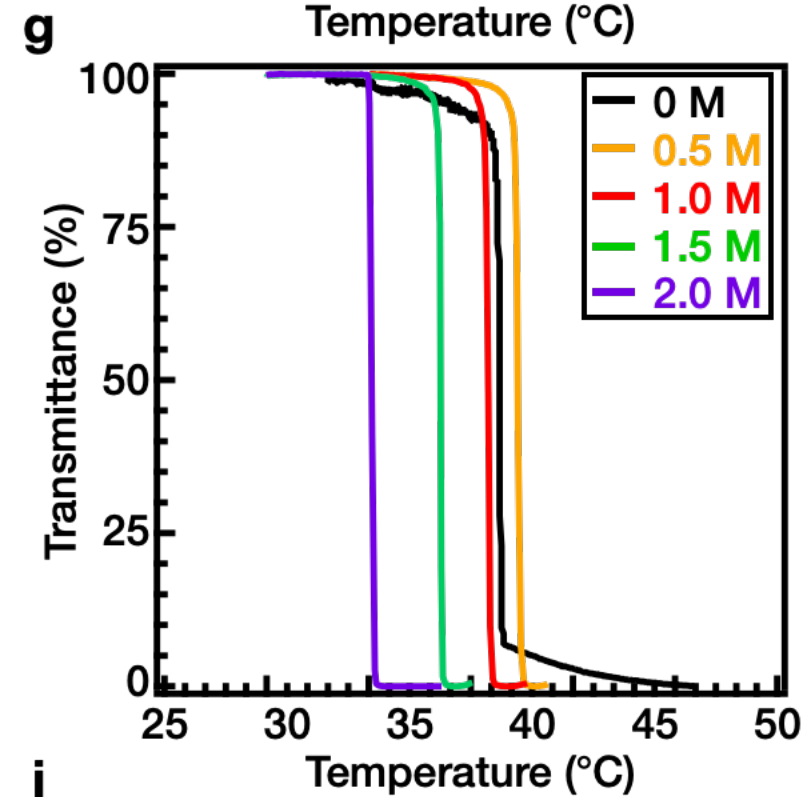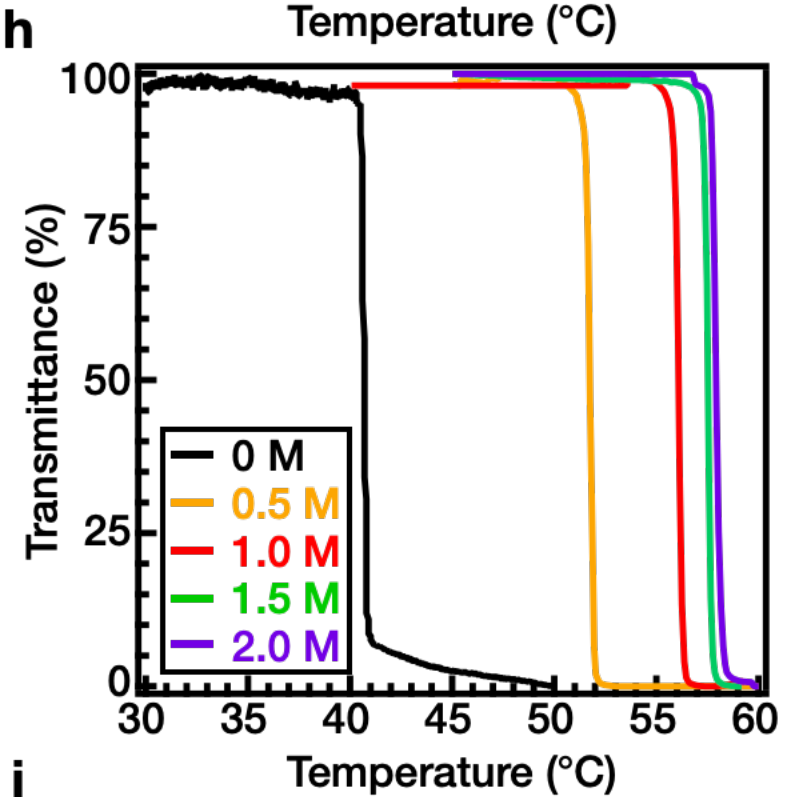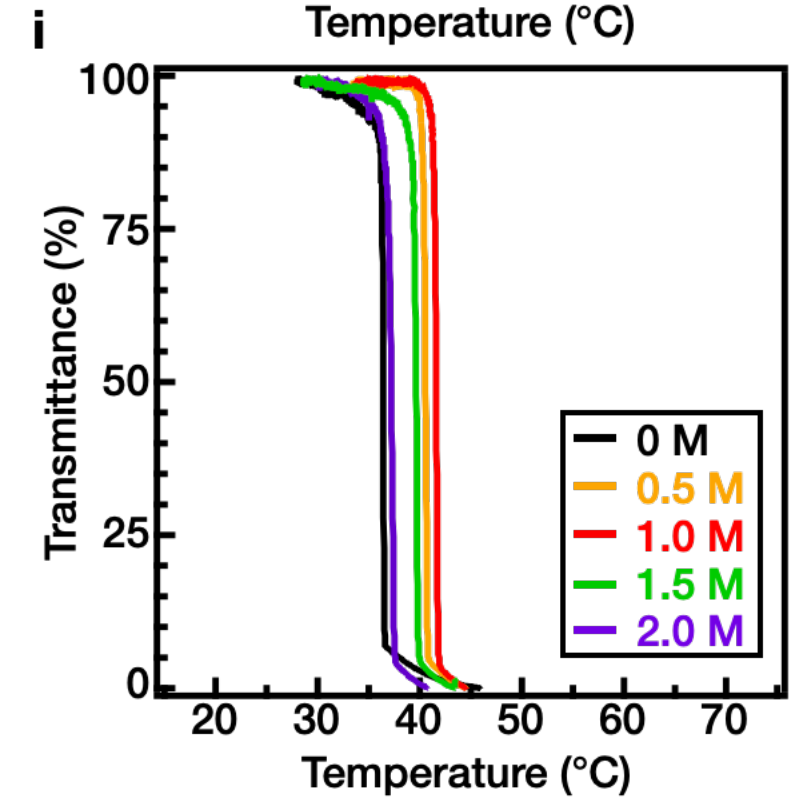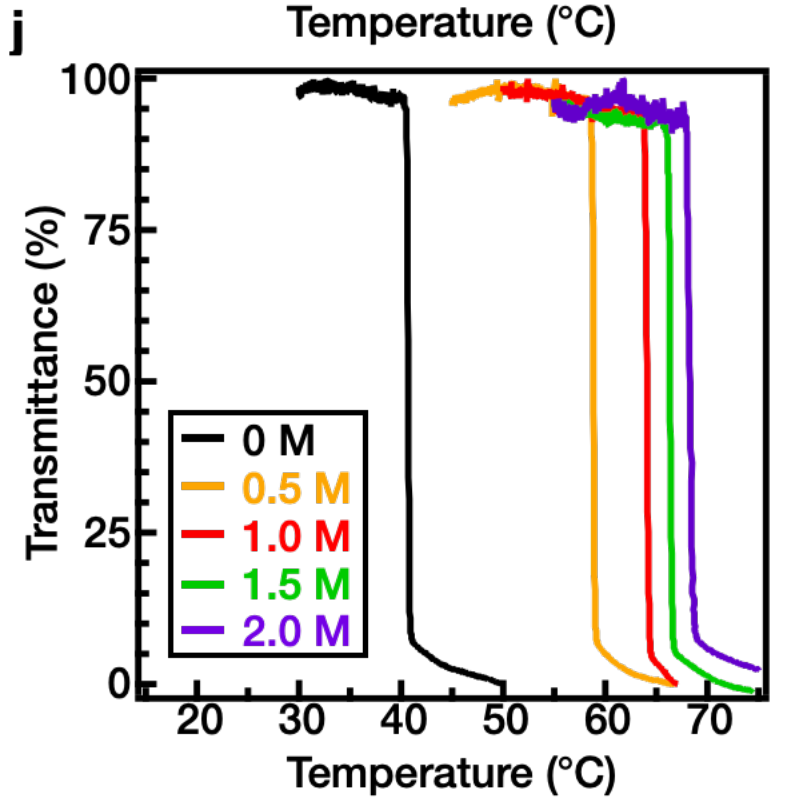

Supplement: d2py00543c6.pdf [file d2py00543c6.pdf]

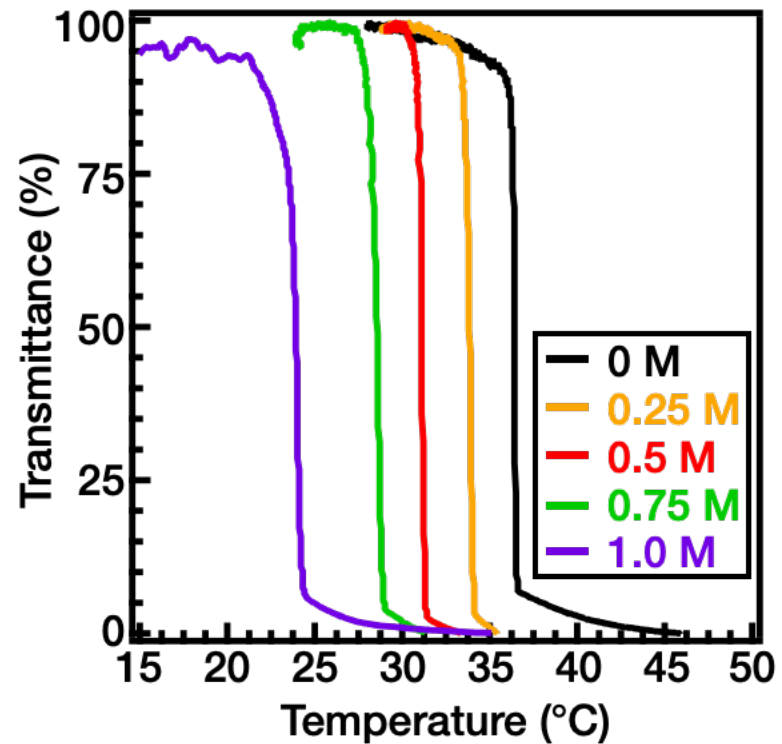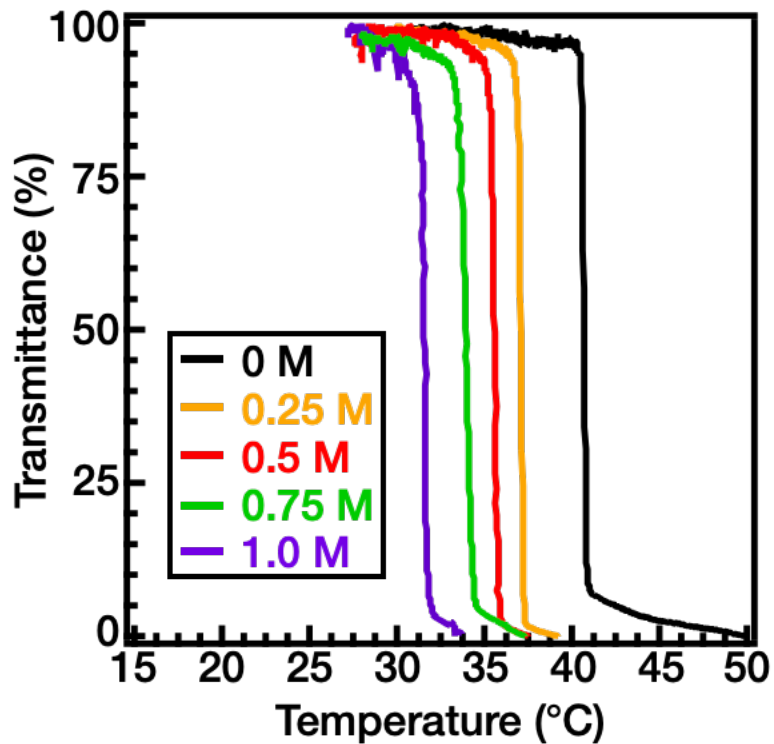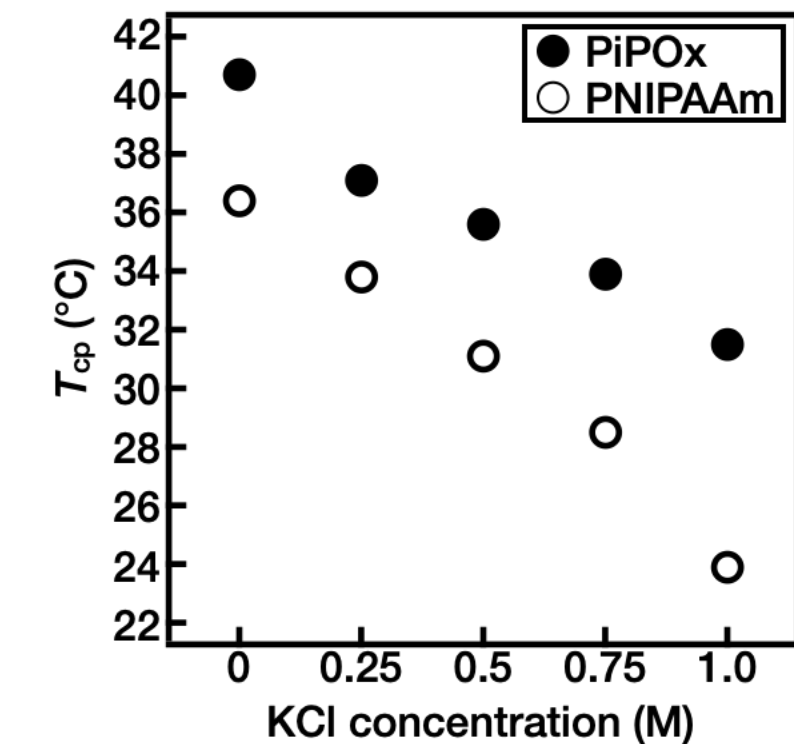

Supplement: d2py00543c7.pdf [file d2py00543c7.pdf]

# PNIPIAAm or PIPox

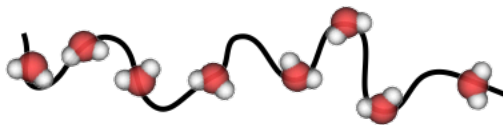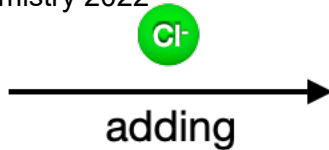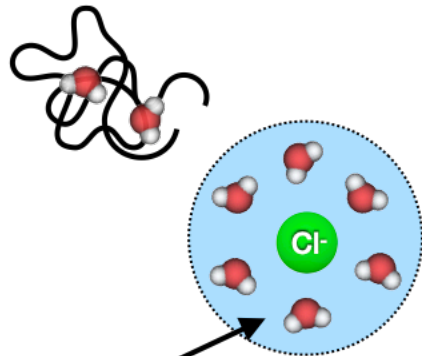

Hydration shell

Supplement: d2py00543c9.pdf [file d2py00543c9.pdf]
